# Supplementary material
Source: publisher figshare collection journal article supplement (https://acs.figshare.com/ndownloader/files/3925756)
Supplement: Supplementary file 1 [file 3925756]

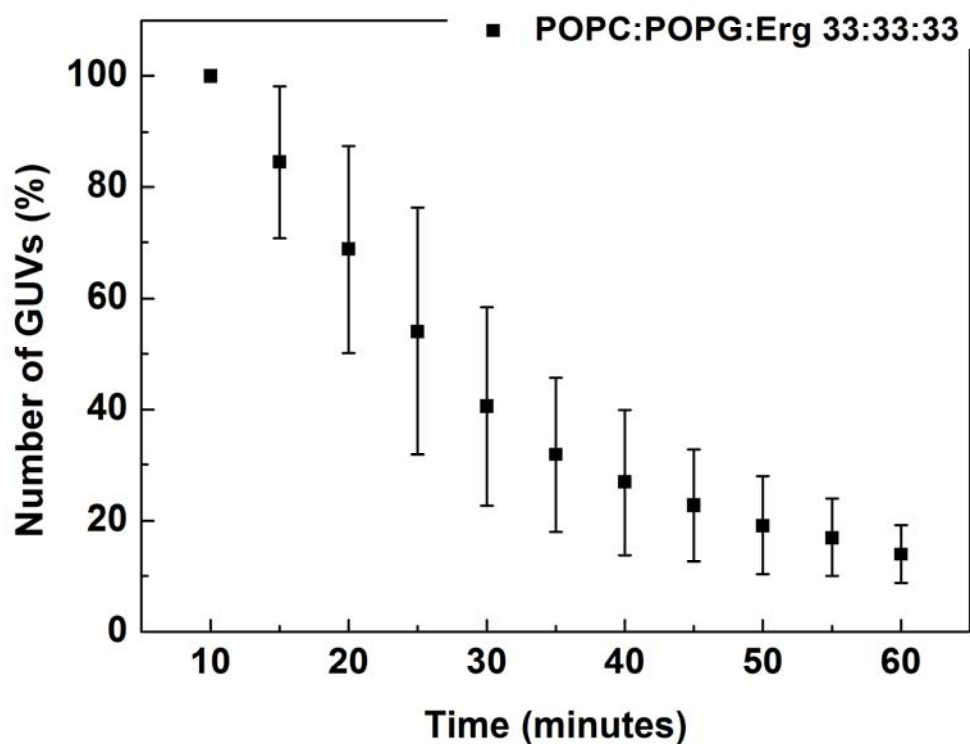

**Supplementary material.** Time course of giant unilamellar vesicles (GUVs) disruption. This graphic shows the percentage (%) of GUVs composed with POPC:POPG:ergosterol (33:33:33 mol%) that remained intact after one hour of incubation with crotonamine [2  $\mu$ M]. This assay was performed by continuous observation, under 10 $\times$  objective that allows observing a larger number of GUVs at the same time. Each experiment was performed in triplicate such that the behavior of *circa* of 100 GUVs was followed for each membrane composition. The error bars correspond to the mean deviation of the three independent experiments.

This information is available free of charge via the Internet at <http://pubs.acs.org>
